# Supplementary material
Source: PubMed Central journal article supplement (PMC3833035)
Supplement: NIHMS55624-supplement-legend_for_supplementary_video.pdf [file NIHMS55624-supplement-legend_for_supplementary_video.pdf]

## **Legend for the Online Supplemental Video**

**Video 1. Visualization of TAMRA-labeled human granulocytes in the microvessels of the cremaster muscle after injection into the femoral artery of VAP-1 KOTG mice using epifluorescence video microscopy.** This real-time video shows appearance of PMNs first in an artery and immediately thereafter in a venule of the cremaster muscle. Flowing, rolling and firmly adherent cells are visible in the venule. Time is shown as HH:MM:SS:MSS.
